# Supplementary material
Source: ML conference proceedings conference paper supplement (https://proceedings.mlr.press/v119/zhu20g.html)
Supplement: Supplementary file [file zhu20g-supp.pdf]

---

**When Demands Evolve Larger and Noisier:  
Learning and Earning in a Growing Environment  
— Supplementary Material**

---

Anonymous Authors<sup>1</sup>

### A. Proofs for Section 3

*Proof of Lemma 1.*

$$\begin{aligned}
 \mathbb{P}\left(\left|\sum_{i=1}^n X_i\right| > \delta\right) &= \mathbb{P}\left(\sum_{i=1}^n X_i > \delta\right) + \mathbb{P}\left(\sum_{i=1}^n X_i < -\delta\right) \\
 &\leq \inf_{\lambda \in \mathbb{R}^+} \frac{\exp(\lambda \sum_{i=1}^n X_i)}{\exp(\lambda \delta)} + \inf_{\lambda \in \mathbb{R}^-} \frac{\exp(\lambda \sum_{i=1}^n X_i)}{\exp(-\lambda \delta)} \\
 &= \inf_{\lambda \in \mathbb{R}^+} \frac{\exp(\lambda \sum_{i=1}^n X_i)}{\exp(\lambda \delta)} + \inf_{\lambda \in \mathbb{R}^+} \frac{\exp(-\lambda \sum_{i=1}^n X_i)}{\exp(\lambda \delta)} \\
 &\leq 2 \inf_{\lambda \in \mathbb{R}^+} \exp\left(\frac{\lambda^2}{2} \sum_{i=1}^n \sigma_i^2 - \lambda \delta\right) = 2 \exp\left(-\frac{\delta^2}{2 \sum_{i=1}^n \sigma_i^2}\right).
 \end{aligned}$$

□

*Proof of Lemma 2.* If  $x \geq 0$ , then

$$S_{x,t} = S_{x,t-1} + t^x \leq \int_{s=1}^t s^x ds + t^x = \frac{t^{x+1} - 1}{x+1} + t^x = \frac{t^{x+1} - 1}{x+1} + \max\{1, t^x\},$$

and

$$S_{x,t} \geq \int_{s=0}^t s^x ds > \int_{s=1}^t s^x ds = \frac{t^{x+1} - 1}{x+1}.$$

If  $-1 \leq x < 0$ , then

$$S_{x,t} = 1 + \sum_{s=2}^t s^x \leq 1 + \int_{s=1}^t s^x dx = 1 + \frac{t^{x+1} - 1}{x+1} \leq \frac{t^{x+1} - 1}{x+1} + \max\{1, t^x\},$$

and

$$S_{x,t} = S_{x,t-1} + t^x \geq \int_{s=1}^t s^x ds + t^x > \frac{t^{x+1} - 1}{x+1}.$$

□

#### A.1. Proofs for Section 3.1

*Proof of Theorem 1.* In the following proof, we assume that  $\epsilon_t \sim \mathcal{N}(0, \sigma_t^2)$ , where  $\sigma_t = t^\alpha \sigma$ . Given  $\theta$ , the log density of history  $H_t$  is

$$f(H_t, \theta) = \sum_{s=1}^t -\frac{(d_s(p_s) - s^\gamma(a - bp_s))^2}{2\sigma_s^2}$$

Then the Fisher Information Matrix is

$$\mathcal{L}_t = \frac{\partial^2 f(H_t, \theta)}{\partial \theta^2} = \sum_{s=1}^t \begin{bmatrix} s^\gamma / \sigma_s \\ s^\gamma p_s / \sigma_s \end{bmatrix} \begin{bmatrix} s^\gamma & s^\gamma p_s \\ s^\gamma & s^\gamma p_s \end{bmatrix} = \sigma^{-2} \sum_{s=1}^t s^{2\gamma-2\alpha} \begin{bmatrix} 1 \\ p_s \end{bmatrix} \begin{bmatrix} 1 & p_s \end{bmatrix}.$$

Let  $\lambda$  be an absolutely continuous density on  $\Theta$ , taking positive values on the interior of  $\Theta$  and zero on its boundary. Then the multivariate van Trees inequality (see, e.g., Gill et al., 1995; Keskin & Zeevi, 2014) implies that

$$\mathbb{E}_\lambda \{ \mathbb{E}_\theta^\pi [ (p_t - \phi(\theta))^2 ] \} \geq \frac{(\mathbb{E}_\lambda [ C(\theta) (\partial \phi / \partial \theta)^\top ])^2}{\mathbb{E}_\lambda [ C(\theta) \mathcal{L}_{t-1}^\pi C(\theta)^\top ] + \tilde{\mathcal{L}}(\lambda)}, \quad (1)$$

where  $\tilde{\mathcal{L}}(\lambda)$  is the Fisher information for the density  $\lambda$ ,  $\mathbb{E}_\lambda$  is the expectation operator with respect to  $\lambda$ , and we let  $C(\theta) = [-\phi(\theta) \ 1]$ . Therefore,

$$\sum_{t=2}^T \mathbb{E}_\lambda \{ \mathbb{E}_\theta^\pi [ t^\gamma (p_t - \phi(\theta))^2 ] \} \geq \sum_{t=2}^T \frac{t^\gamma (\mathbb{E}_\lambda [ \phi(\theta) / (2b) ])^2}{\mathbb{E}_\lambda [ C(\theta) \mathbb{E}_\theta^\pi [ \mathcal{L}_{t-1}^\pi C(\theta)^\top ] + \tilde{\mathcal{L}}(\lambda)}.$$

Thus,

$$\sup_{\theta \in \Theta} \mathbb{E}_\theta^\pi \left[ \sum_{t=1}^T t^\gamma (p_t - \phi(\theta))^2 \right] \geq \frac{\left( \frac{T^{\gamma+1}-1}{\gamma+1} \right) \inf_{\theta \in \Theta} (\phi(\theta) / (2b))^2}{\sigma^{-2} \sup_{\theta \in \Theta} \mathbb{E}_\theta^\pi \left[ \sum_{t=1}^T t^{2\gamma-2\alpha} (p_t - \phi(\theta))^2 \right] + \tilde{\mathcal{L}}(\lambda)}. \quad (2)$$

### Part I: Fixed-time regret lower bound

Note that

$$\min \left\{ \alpha + \frac{1}{2}, \frac{(\gamma+1)^2}{3\gamma-2\alpha+2} \right\} = \begin{cases} \alpha + \frac{1}{2}, & \text{if } \alpha \in [0, \frac{\gamma}{2}], \\ \frac{(\gamma+1)^2}{3\gamma-2\alpha+2}, & \text{if } \alpha \in (\frac{\gamma}{2}, \gamma + \frac{1}{2}), \end{cases}$$

and we will prove the desired result in four cases.

Case 1: If  $\alpha \in [0, \frac{\gamma}{2}]$ , then applying the following inequality into (2) yields the desired result:

$$\sup_{\theta \in \Theta} \mathbb{E}_\theta^\pi \left[ \sum_{t=1}^T t^{2\gamma-2\alpha} (p_t - \phi(\theta))^2 \right] \leq T^{\gamma-2\alpha} \sup_{\theta \in \Theta} \mathbb{E}_\theta^\pi \left[ \sum_{t=1}^T t^\gamma (p_t - \phi(\theta))^2 \right].$$

Case 2: If  $\alpha \in (\frac{\gamma}{2}, \gamma + \frac{1}{2})$ , let  $\eta = \frac{\gamma+1}{3\gamma-2\alpha+2} < 1$  and  $c > 0$  be a constant such that  $c < \frac{1}{2}$  and  $cT^\eta \in \mathbb{Z}_+$ . Then, using the notation that  $\Delta_t = (p_t - \phi(\theta))^2$ , we have

$$\begin{aligned} & \mathbb{E}_\lambda \{ \mathbb{E}_\theta^\pi [ \sum_{t=1}^T t^\gamma \Delta_t ] \} \\ &= \mathbb{E}_\lambda \{ \mathbb{E}_\theta^\pi [ \sum_{t=1}^{cT^\eta} t^\gamma \Delta_t ] \} + \mathbb{E}_\lambda \{ \mathbb{E}_\theta^\pi [ \sum_{t=cT^\eta+1}^{\frac{T}{2}} t^{(2\alpha-\gamma)+(2\gamma-2\alpha)} \Delta_t ] \} + \mathbb{E}_\lambda \{ \mathbb{E}_\theta^\pi [ \sum_{t=\frac{T}{2}+1}^T t^\gamma \Delta_t ] \} \\ &\geq 0 + \frac{1}{2} (cT^\eta)^{2\alpha-\gamma} \mathbb{E}_\lambda \{ \mathbb{E}_\theta^\pi [ \sum_{t=cT^\eta+1}^T t^{2\gamma-2\alpha} \Delta_t ] \} + \mathbb{E}_\lambda \{ \mathbb{E}_\theta^\pi [ \sum_{t=\frac{T}{2}+1}^T (t^\gamma - \frac{1}{2} (cT^\eta)^{2\alpha-\gamma} t^{2\gamma-2\alpha}) \Delta_t ] \} \\ &\geq \frac{1}{2} (cT^\eta)^{2\alpha-\gamma} \mathbb{E}_\lambda \{ \mathbb{E}_\theta^\pi [ \sum_{t=cT^\eta+1}^T t^{2\gamma-2\alpha} \Delta_t ] \} + \frac{\left( \sum_{t=\frac{T}{2}+1}^T t^\gamma - \sum_{t=\frac{T}{2}+1}^T \frac{1}{2} t^{2\alpha-\gamma} t^{2\gamma-2\alpha} \right) \inf_{\theta \in \Theta} (\phi(\theta) / (2b))^2}{\sigma^{-2} \mathbb{E}_\lambda \{ \mathbb{E}_\theta^\pi [ \sum_{t=1}^T t^{2\gamma-2\alpha} (p_t - \phi(\theta))^2 ] \} + \tilde{\mathcal{L}}(\lambda)} \\ &\geq \frac{1}{2} (cT^\eta)^{2\alpha-\gamma} \mathbb{E}_\lambda \{ \mathbb{E}_\theta^\pi [ \sum_{t=cT^\eta+1}^T t^{2\gamma-2\alpha} \Delta_t ] \} + \frac{\frac{1}{2} \int_{\frac{T}{2}}^T t^\gamma dt \inf_{\theta \in \Theta} (\phi(\theta) / (2b))^2}{\sigma^{-2} \mathbb{E}_\lambda \{ \mathbb{E}_\theta^\pi [ \sum_{t=1}^T t^{2\gamma-2\alpha} (p_t - \phi(\theta))^2 ] \} + \tilde{\mathcal{L}}(\lambda)} \\ &= \frac{1}{2} (cT^\eta)^{2\alpha-\gamma} y + \frac{c_0 T^{\gamma+1}}{\sigma^{-2} (x+y) + \tilde{\mathcal{L}}(\lambda)}, \end{aligned}$$

where in the second inequality we utilize (1) and  $cT^\eta \leq \frac{T}{2}$ , and in the last equality we let

$$x = \mathbb{E}_\lambda \{ \mathbb{E}_\theta^\pi [ \sum_{t=1}^{cT^\eta} t^{2\gamma-2\alpha} \Delta_t ] \}, \quad y = \mathbb{E}_\lambda \{ \mathbb{E}_\theta^\pi [ \sum_{t=1}^T t^{2\gamma-2\alpha} \Delta_t ] \}, \quad \text{and } c_0 = \frac{1-2^{-\gamma}}{2(\gamma+1)} \inf_{\theta \in \Theta} (\phi(\theta)/(2b))^2$$

Obviously,  $x \leq (u-l)^2 \sum_{t=1}^{cT^\eta} t^{2\gamma-2\alpha}$ . If  $y \geq (u-l)^2 \sum_{t=1}^{cT^\eta} t^{2\gamma-2\alpha}$ , we have

$$\mathbb{E}_\lambda \{ \mathbb{E}_\theta^\pi [ \sum_{t=1}^T t^\gamma \Delta_t ] \} \geq \frac{1}{2} (u-l)^2 (cT^\eta)^{2\alpha-\gamma} \sum_{t=1}^{cT^\eta} t^{2\gamma-2\alpha} = \Omega(T^\beta).$$

If  $y < (u-l)^2 \sum_{t=1}^{cT^\eta} t^{2\gamma-2\alpha}$ , then we have

$$\mathbb{E}_\lambda \{ \mathbb{E}_\theta^\pi [ \sum_{t=1}^T t^\gamma \Delta_t ] \} \geq \frac{c_0 T^{\gamma+1}}{2\sigma^{-2}(u-l)^2 \sum_{t=1}^{cT^\eta} t^{2\gamma-2\alpha} + \tilde{\mathcal{L}}(\lambda)} = \Omega(T^{\gamma+1-\eta(2\gamma-2\alpha+1)}) = \Omega(T^\beta).$$

Case 3: If  $\alpha = \gamma + \frac{1}{2}$ , then  $2\gamma - 2\alpha = -1$ . Thus,

$$\sum_{t=1}^T t^{2\gamma-2\alpha} (p_t - \phi(\theta))^2 \leq \sum_{t=1}^T t^{2\gamma-2\alpha} (u-l)^2 = O(\log T).$$

Then from (2), we can directly yield the result.

Case 4: If  $\alpha > \gamma + \frac{1}{2}$ , then  $2\gamma - 2\alpha < -1$ . Thus,

$$\sum_{t=1}^T t^{2\gamma-2\alpha} (p_t - \phi(\theta))^2 \leq \sum_{t=1}^T t^{2\gamma-2\alpha} (u-l)^2 < +\infty.$$

Then from (2), we can directly yield the result.

## Part II: Any-time regret lower bound

Case 1: If  $\alpha \in [0, \frac{\gamma}{2}]$ , the result holds directly from Case 1 in Part I of our proof.

Case 2: If  $\alpha \in (\frac{\gamma}{2}, \gamma + \frac{1}{2})$ , suppose that the conclusion does not hold. Let  $\beta = \alpha + \frac{1}{2}$ . Then for any  $\epsilon > 0$ , there exists an any-time pricing policy  $\pi_\epsilon$ , a constant  $C_\epsilon \in (0, \epsilon)$ , and  $T_\epsilon = 2^{k_\epsilon}$  such that for any  $T \geq T_\epsilon$ , we have

$$\sup_{\theta \in \Theta} \mathbb{E}_\theta^{\pi_\epsilon} [ \sum_{t=1}^T t^\gamma \Delta_t ] \leq c_\epsilon T^\beta, \quad (3)$$

where  $c_\epsilon = C_\epsilon / \inf_{\theta \in \Theta} b$ . The critical step lies in estimating  $\mathbb{E}_\theta^{\pi_\epsilon} [ \sum_{t=1}^T t^{2\gamma-2\alpha} (p_t - \phi(\theta))^2 ]$ . In fact, we have,  $\forall \theta \in \Theta$ ,

$$\begin{aligned} \mathbb{E}_\theta^{\pi_\epsilon} [ \sum_{t=1}^T t^{2\gamma-2\alpha} \Delta_t ] &\leq \mathbb{E}_\theta^{\pi_\epsilon} [ \sum_{t=1}^{T_\epsilon} t^\gamma \Delta_t ] + \sum_{k=\log_2 T_\epsilon}^{\lfloor \log_2 T \rfloor} \sum_{t=2^k}^{2^{k+1}-1} t^{2\gamma-2\alpha} \mathbb{E}_\theta^{\pi_\epsilon} [ \Delta_t ] \\ &\leq \mathbb{E}_\theta^{\pi_\epsilon} [ \sum_{t=1}^{T_\epsilon} t^\gamma \Delta_t ] + \sum_{k=\log_2 T_\epsilon}^{\lfloor \log_2 T \rfloor} 2^{k(\gamma-2\alpha)} \sum_{t=2^k}^{2^{k+1}-1} t^\gamma \mathbb{E}_\theta^{\pi_\epsilon} [ \Delta_t ] \\ &\leq (u-l)^2 T_\epsilon^{\gamma+1} + \sum_{k=0}^{\lfloor \log_2 T \rfloor} 2^{k(\gamma-2\alpha)} c_\epsilon 2^{(k+1)\beta} \\ &= (u-l)^2 T_\epsilon^{\gamma+1} + c_\epsilon 2^\beta \sum_{k=0}^{\lfloor \log_2 T \rfloor} 2^{(\gamma-2\alpha+\beta)k} \end{aligned}$$

From our assumption,  $\beta = \alpha + \frac{1}{2} > 2\alpha - \gamma$ , then we have

$$c_\epsilon 2^\beta \sum_{k=0}^{\lfloor \log_2 T \rfloor} 2^{(\gamma-2\alpha+\beta)k} \leq c_\epsilon 2^\beta \frac{(2T)^{\gamma-2\alpha+\beta} - 1}{2^{\gamma-2\alpha+\beta} - 1}.$$

Thus we have

$$\sup_{\theta \in \Theta} \mathbb{E}_\theta^{\pi_\epsilon} \left[ \sum_{t=1}^T t^{2\gamma-2\alpha} \Delta_t \right] \leq (u-l)^2 T_\epsilon^{\gamma+1} + c_\epsilon 2^\beta \frac{(2T)^{\gamma-2\alpha+\beta} - 1}{2^{\gamma-2\alpha+\beta} - 1}. \quad (4)$$

Together with (2), (3) and (4), we have

$$c_\epsilon T^\beta (u-l)^2 T_\epsilon^{\gamma+1} + c_\epsilon^2 \sigma^{-2} (2T)^\beta \frac{(2T)^{(\gamma-2\alpha+\beta)} - 1}{2^{\gamma-2\alpha+\beta} - 1} + c_\epsilon T^\beta \tilde{\mathcal{L}}(\lambda) \geq \frac{T^{\gamma+1} - 1}{\gamma + 1} \inf_{\theta \in \Theta} (\phi(\theta)/(2\beta))^2$$

for all  $T \geq T_\epsilon$ . Let  $\tilde{C} = \sigma^{-2} \frac{2^{\gamma+1}}{2^{\gamma+\frac{1}{2}-\alpha} - 1}$  that depends only on  $\alpha, \gamma$  and  $\sigma$ . Then dividing the both sides of the above formula by  $T^{\gamma+1}$  and taking  $T$  to  $+\infty$  yields

$$c_\epsilon^2 \tilde{C} \geq \frac{1}{\gamma + 1} \inf_{\theta \in \Theta} (\phi(\theta)/(2b))^2 > 0.$$

However, when  $\epsilon \rightarrow 0$ , the left hand side turns into 0. A contradiction! Therefore, there must exists some constant  $C > 0$  such that for any *any-time* pricing policy  $\pi$ ,

$$\limsup_T \left\{ \sup_{\theta \in \Theta} \{R_\theta^\pi(T)\} / T^{\alpha+\frac{1}{2}} \right\} \geq C.$$

□

## A.2. Proofs for Section 3.2

*Proof of Lemma 3.* Let  $y = (y_1, y_2)$  such that  $\|y\| = 1$ . We have

$$\begin{aligned} y^\top \mathcal{J}_t y &= \sum_{s=1}^t s^{2\gamma-2\alpha} (y_1 + y_2 p_s)^2 = \sum_{s=1}^t s^{2\gamma-2\alpha} (y_1 + y_2 \bar{p}_t)^2 + y_2^2 \sum_{s=1}^t s^{2\gamma-2\alpha} (p_s - \bar{p}_t)^2 \\ &\geq \left( \frac{(y_1 + y_2 \bar{p}_t)^2}{(u-l)^2} + y_2^2 \right) J_t \geq \frac{2}{(1+2u-l)^2} J_t. \end{aligned}$$

□

*Proof of Lemma 4.* It's easy to obtain that  $\hat{\theta}_t - \theta = \mathcal{J}_t^{-1} \mathcal{M}_t$ , where

$$\mathcal{M}_t = \sum_{s=1}^t s^{\gamma-\alpha} [\tilde{\epsilon}_s p_s \tilde{\epsilon}_s]^\top.$$

Under our assumption, we have

$$\mathbb{E}_\theta^\pi [\exp(z \tilde{\epsilon}_t)] \leq \exp\left(\frac{1}{2} \sigma^2 z^2\right), \forall z \in \mathbb{R}.$$

Now we define a series of martingales  $\{Z_s^y\}$ :

$$Z_s^y = \exp\left\{ \frac{1}{\zeta \sigma^2} (y^\top \mathcal{M}_s - \frac{1}{2} y^\top \mathcal{J}_s y) \right\}, \forall s = 1, 2, \dots,$$

165  
166  
167  
168  
169  
170  
171  
172  
173  
174  
175  
176  
177  
178  
179  
180  
181  
182  
183  
184  
185  
186  
187  
188  
189  
190  
191  
192  
193  
194  
195  
196  
197  
198  
199  
200  
201  
202  
203  
204  
205  
206  
207  
208  
209  
210  
211  
212  
213  
214  
215  
216  
217  
218  
219

where  $\zeta = 1 \vee \delta$  and  $\|y\| = \delta$ . Then  $Z_s^y$  is integrable with respect to  $y$  for all  $s$ . Let  $\mathcal{F}_s = \sigma(d_1, \dots, d_s)$ , then we get

$$\begin{aligned} \mathbb{E}_\theta^\pi[Z_s^y | \mathcal{F}_{s-1}] &= \exp\left\{\frac{1}{\zeta\sigma^2}(y^\top \mathcal{M}_{s-1} - \frac{1}{2}y^\top \mathcal{J}_s y)\right\} \mathbb{E}_\theta^\pi\left[\exp\left\{\frac{1}{\zeta\sigma^2}y^\top (\mathcal{M}_s - \mathcal{M}_{s-1})\right\} | \mathcal{F}_{s-1}\right] \\ &\leq \exp\left\{\frac{1}{\zeta\sigma^2}(y^\top \mathcal{M}_{s-1} - \frac{1}{2}y^\top \mathcal{J}_s y)\right\} \exp\left\{\frac{1}{2\zeta\sigma^2}y^\top \begin{bmatrix} s^{2\gamma-2\alpha} & s^{2\gamma-2\alpha} p_s \\ s^{2\gamma-2\alpha} p_s & s^{2\gamma-2\alpha} p_s^2 \end{bmatrix} y\right\} \\ &= \exp\left\{\frac{1}{\zeta\sigma^2}(y^\top \mathcal{M}_{s-1} - \frac{1}{2}y^\top \mathcal{J}_{s-1} y)\right\} = Z_{s-1}^y. \end{aligned}$$

Thus  $(Z_s^y, \mathcal{F}_s)$  is a super-martingale for any  $y \in \mathbb{R}^2$  with  $\|y\| = \delta$ .

Now we consider  $\tilde{Z}_s = Z_s^{\omega_s}$  such that  $\omega_s = \delta \mathcal{J}_s^{-1} \mathcal{M}_s / \|\mathcal{J}_s^{-1} \mathcal{M}_s\|$  for all  $s$ . Fix  $m > 0$  and let  $\xi \geq \delta$  be a positive real number to be determined later. Let  $A = \{\|\mathcal{M}_t\| \leq \xi S_{2\gamma-2\alpha, t}\} \in \mathcal{F}_t$ . Then we have

$$\begin{aligned} \mathbb{P}_\theta^\pi(\|\hat{\theta} - \theta\| > \delta, J_t \geq m) &= \mathbb{P}_\theta^\pi(\|\mathcal{J}_t^{-1} \mathcal{M}_t\| > \delta, J_t \geq m) \\ &\leq \mathbb{P}_\theta^\pi(\|\mathcal{J}_t^{-1} \mathcal{M}_t\| > \delta, J_t \geq m, A) + \mathbb{P}_\theta^\pi(J_t \geq m, A^c). \end{aligned} \quad (5)$$

For the first term, we have

$$\begin{aligned} \mathbb{P}_\theta^\pi(\|\mathcal{J}_t^{-1} \mathcal{M}_t\| > \delta, J_t \geq m, A) &\leq \mathbb{P}_\theta^\pi(\omega_t^\top \mathcal{M}_t \geq \omega_t^\top \mathcal{J}_t \omega_t, J_t \geq m, A) \\ &\leq \mathbb{P}_\theta^\pi(\tilde{Z}_t \geq \exp(\frac{\omega_t^\top \mathcal{J}_t \omega_t}{2\zeta\sigma^2}), J_t \geq m, A) \\ &\leq \mathbb{P}_\theta^\pi(\tilde{Z}_t \geq \exp(\frac{\mu\delta^2 m}{2\zeta\sigma^2}), A) \quad (\text{Lemma 3}) \end{aligned}$$

Note that

$$\begin{aligned} &\left(\omega_t^\top \mathcal{M}_t - \frac{1}{2}\omega_t^\top \mathcal{J}_t \omega_t\right) - \left(y^\top \mathcal{M}_t - \frac{1}{2}y^\top \mathcal{J}_t y\right) \\ &\leq (\omega_t - y)^\top (\mathcal{M}_t - \mathcal{J}_t y) \\ &\leq \|\omega_t - y\| (\|\mathcal{M}_t\| + \|\mathcal{J}_t y\|) \\ &\leq \|\omega_t - y\| \left(\|\mathcal{M}_t\| + \sum_{s=1}^t s^{2\gamma-2\alpha} \|[1 \ p_s]^\top (y_1 + p_s y_2)\|\right) \\ &\leq \|\omega_t - y\| (\xi S_{2\gamma-2\alpha, t} + (1 + u^2)\delta S_{2\gamma-2\alpha, t}) \\ &\leq \|\omega_t - y\| (2 + u^2)\xi S_{2\gamma-2\alpha, t}. \end{aligned}$$

Thus,  $\tilde{Z}_t \leq \exp\left(\frac{\xi(2+u^2)}{\zeta\sigma^2}\right) Z_t^y$  holds for any  $y$  that is within the  $(1/S_{2\gamma-2\alpha, t})$ -neighbourhood of  $\omega_t$ . Therefore, considering a set of  $\lceil \pi\delta S_{2\gamma-2\alpha, t} \rceil$  points evenly spaced on the circle  $\{y \in \mathbb{R}^2 : \|y\| = \delta\}$  yields

$$\mathbb{P}_\theta^\pi(\|\mathcal{J}_t^{-1} \mathcal{M}_t\| > \delta, J_t \geq m, A) \leq \exp\left(\frac{\xi(2+u^2)}{\zeta\sigma^2}\right) (1 + \pi(1 \vee \delta) S_{2\gamma-2\alpha, t}) \exp\left(-\frac{\mu\delta^2 m}{2\zeta\sigma^2}\right), \quad (6)$$

where we use Markov Inequality for the super-martingale  $(Z_t^y, \mathcal{F}_t)$ .

For the second term, we have

$$\begin{aligned}
 \mathbb{P}_\theta^\pi(J_t \geq m, A^c) &= \mathbb{P}_\theta^\pi(J_t \geq m, \|\mathcal{M}_t\| > \xi S_{2\gamma-2\alpha,t}) \\
 &\leq \mathbb{P}_\theta^\pi\left(J_t \geq m, \left|\sum_{s=1}^t s^{\gamma-\alpha} \epsilon_s\right| > \frac{\xi S_{2\gamma-2\alpha,t}}{\sqrt{2}}\right) + P_\theta^\pi\left(J_t \geq m, \left|\sum_{s=1}^t s^{\gamma-\alpha} \epsilon_s p_s\right| > \frac{\xi S_{2\gamma-2\alpha,t}}{\sqrt{2}}\right) \\
 &\leq \mathbb{P}_\theta^\pi\left((u-l)^2 \sum_{s=1}^t s^{2\gamma-2\alpha} \geq m, \left|\frac{\sum_{s=1}^t s^{\gamma-\alpha} \epsilon_s}{\sqrt{\sum_{s=1}^t s^{2\gamma-2\alpha}}}\right| > \frac{\xi S_{2\gamma-2\alpha,t}}{\sqrt{2 \sum_{s=1}^t s^{2\gamma-2\alpha}}}\right) + \\
 &\quad \mathbb{P}_\theta^\pi\left((u-l)^2 \sum_{s=1}^t s^{2\gamma-2\alpha} \geq m, \left|\frac{\sum_{s=1}^t s^{\gamma-\alpha} \epsilon_s}{\sqrt{\sum_{s=1}^t s^{2\gamma-2\alpha}}}\right| > \frac{\xi S_{2\gamma-2\alpha,t}}{u \sqrt{2 \sum_{s=1}^t s^{2\gamma-2\alpha}}}\right) \\
 &\leq \mathbb{P}_\theta^\pi\left(\left|\frac{\sum_{s=1}^t s^{\gamma-\alpha} \epsilon_s}{\sqrt{\sum_{s=1}^t s^{2\gamma-2\alpha}}}\right| > \frac{\xi \sqrt{m}}{\sqrt{2}(u-l)}\right) + \mathbb{P}_\theta^\pi\left(\left|\frac{\sum_{s=1}^t s^{\gamma-\alpha} \epsilon_s}{\sqrt{\sum_{s=1}^t s^{2\gamma-2\alpha}}}\right| > \frac{\xi \sqrt{m}}{\sqrt{2}(u-l)u}\right) \\
 &\leq 2 \exp\left(-\frac{\xi^2 m}{4\sigma^2(u-l)^2}\right) + 2 \exp\left(-\frac{\xi^2 m}{4\sigma^2(u-l)^2 u^2}\right), \tag{7}
 \end{aligned}$$

where in the last inequality we utilize Lemma 1. Now we let  $\xi = 1 \vee \delta$ , we can obtain in (6) and (7) that

$$\begin{aligned}
 \mathbb{P}_\theta^\pi(\|\mathcal{J}_t^{-1} \mathcal{M}_t\| > \delta, J_t \geq m, A) &\leq \exp\left(\frac{2+u^2}{\sigma^2}\right) (1+\pi)(1 \vee \delta) S_{2\gamma-2\alpha,t} \exp\left(-\frac{\mu}{2\sigma^2} m(\delta \wedge \delta^2)\right), \\
 \mathbb{P}_\theta^\pi(J_t \geq m, A^c) &\leq 4 \exp\left(-\frac{1}{4\sigma^2(u-l)^2(u \wedge 1)^2} m(\delta \wedge \delta^2)\right).
 \end{aligned}$$

Now letting  $k = \exp(\frac{2+u^2}{\sigma^2})(1+\pi) + 4$  and  $\rho = \frac{\mu}{2\sigma^2} \wedge \frac{1}{4\sigma^2(u-l)^2(u \wedge 1)^2}$  completes the proof.  $\square$

*Proof of Theorem 2.* Since  $p_1 \neq p_2$ , we have  $J_t > 0$  for all  $t \geq 2$ . From Lemma 3,  $\mathcal{J}_t$  is invertible for all  $t \geq 2$ , and thus  $\vartheta_t$  exists. Therefore, for any  $t \geq 2$ ,

$$\begin{aligned}
 &\mathbb{E}_\theta^\pi[(\phi(\theta) - \phi(\vartheta_t))^2] \\
 &\leq K \mathbb{E}_\theta^\pi \|\theta - \vartheta_t\|^2 \leq K \mathbb{E}_\theta^\pi \|\theta - \hat{\theta}_t\|^2 \\
 &= K \int_0^\infty \mathbb{P}_\theta^\pi(\|\theta - \hat{\theta}_t\|^2 > x, J_t \geq \kappa_0 \sqrt{S_{2\gamma-2\alpha,t}}) dx \\
 &\leq \frac{(2\gamma-2\alpha+1)K \log t}{\rho \kappa_0 \sqrt{S_{2\gamma-2\alpha,t}}} + K \int_{\frac{(2\gamma-2\alpha+1) \log t}{\rho \kappa_0 \sqrt{S_{2\gamma-2\alpha,t}}}}^1 k S_{2\gamma-2\alpha,t} \exp(-\rho x \kappa_0 \sqrt{S_{2\gamma-2\alpha,t}}) dx + \\
 &\quad K \int_1^\infty k \sqrt{x} S_{2\gamma-2\alpha,t} \exp(-\rho \sqrt{x} \kappa_0 \sqrt{S_{2\gamma-2\alpha,t}}) dx \quad (\text{Lemma 4}) \\
 &\leq \frac{(2\gamma-2\alpha+1)K}{\rho \kappa_0 \sqrt{S_{2\gamma-2\alpha,t}}} \log t + \frac{Kk}{\rho \kappa_0} t^{-(2\gamma-2\alpha+1)} \sqrt{S_{2\gamma-2\alpha,t}} + \\
 &\quad \frac{2Kk}{\rho^3 \kappa_0^3 \sqrt{S_{2\gamma-2\alpha,t}}} \int_{\rho \kappa_0 \sqrt{S_{2\gamma-2\alpha,t}}}^{+\infty} x^2 \exp(-x) dx,
 \end{aligned}$$

where in the first inequality we bound  $\sup_{\theta' \in \Theta} \left\| \frac{\partial \phi(\theta')}{\partial \theta'} \right\|^2$  by  $K$ . Notice that

$$\int_{\rho \kappa_0 \sqrt{S_{2\gamma-2\alpha,t}}}^{+\infty} x^2 \exp(-x) dx \leq \int_0^{+\infty} x^2 \exp(-x) dx = 2.$$

Therefore, for all  $t \geq 2$ ,

$$\begin{aligned} & \mathbb{E}_\theta^\pi[(\phi(\theta) - \phi(\vartheta_t))^2] \\ & \leq \frac{\max\{2\gamma - 2\alpha + 1, 1\}K}{\rho\kappa_0\sqrt{S_{2\gamma-2\alpha,t}}} \left( \log t + k + \frac{2k}{\rho\kappa_0} \int_{\rho^2\kappa_0^2\sqrt{S_{2\gamma-2\alpha,t}}}^{\infty} x^2 \exp(-x) dx \right) \\ & \leq C_0 t^{\alpha-\gamma-\frac{1}{2}} \log t, \end{aligned}$$

where  $C_0$  is independent of  $t$ , but possibly dependent on  $\alpha$  and  $\gamma$ . Therefore,

$$\begin{aligned} R_\theta^\pi(T) & \leq \sum_{t=1}^2 t^\gamma \mathbb{E}_\theta^\pi[(\phi(\theta) - p_t)^2] + b_{\max} \sum_{t=3}^T t^\gamma \mathbb{E}_\theta^\pi[(\phi(\theta) - \phi(\vartheta_{t-1}))^2] + b_{\max} \sum_{t=3}^T t^\gamma \mathbb{E}_\theta^\pi[(\phi(\vartheta_{t-1}) - p_t)^2] \\ & \leq C_1 + b_{\max} C_0 \left(\frac{3}{2}\right)^\gamma \sum_{t=1}^T t^{\alpha-\frac{1}{2}} \log T + b_{\max} \kappa_1 S_{\alpha-\frac{1}{2},T} \\ & = O\left(T^{\alpha+\frac{1}{2}} \log T\right). \end{aligned}$$

□

*Proof of Corollary 1.* We only need to verify the two conditions in Theorem 2. First,

$$\begin{aligned} J_t & = \sum_{s=1}^t s^{2\gamma-2\alpha} (p_s - \bar{p}_t)^2 = \sum_{s=2}^t \frac{s^{2\gamma-2\alpha} S_{s-1,2\gamma-2\alpha}}{S_{s,2\gamma-2\alpha}} (p_s - \bar{p}_{s-1})^2 \\ & \geq \sum_{s=2}^t \frac{s^{2\gamma-2\alpha} S_{s-1,2\gamma-2\alpha}}{S_{s,2\gamma-2\alpha}} \left( \kappa s^{\frac{\alpha-\gamma}{2}-\frac{1}{4}} \right)^2 \geq \frac{\kappa^2}{1+2^{2\gamma-2\alpha}} \sum_{s=2}^t s^{\gamma-\alpha-\frac{1}{2}} \\ & = \Omega(S_{\gamma-\alpha-\frac{1}{2},t}) = \Omega(t^{\gamma-\alpha+\frac{1}{2}}) \\ & = \Omega\left(\sqrt{t^{2\gamma-2\alpha+1}}\right) = \Omega\left(\sqrt{S_{2\gamma-2\alpha,t}}\right). \end{aligned}$$

Second,

$$\sum_{s=0}^t s^\gamma (\phi(\vartheta_s) - p_{s+1})^2 \leq \sum_{s=1}^t s^\gamma \left( \kappa s^{\frac{\alpha-\gamma}{2}-\frac{1}{4}} \right)^2 = \kappa^2 \sum_{s=1}^t s^{\alpha-\frac{1}{2}} = O(S_{\alpha-\frac{1}{2},t}).$$

□

### A.3. Proofs for Section 3.3

*Proof of Theorem 3.* We have

$$\det(\mathcal{J}_t) = \lambda_1(\mathcal{J}_t) \lambda_2(\mathcal{J}_t) \leq \left( \frac{\lambda_1(\mathcal{J}_t) + \lambda_2(\mathcal{J}_t)}{2} \right)^2 = \frac{1}{4} \text{tr}(\mathcal{J}_t)^2 = \frac{1}{4} \left( \lambda + (1+u^2) \sum_{s=1}^t s^{2\gamma-2\alpha} \right)^2. \quad (8)$$

For fixed  $T$ , we let  $\delta = 1/\sum_{s=1}^T s^\gamma$ , then

$$\frac{\det(\mathcal{J}_t)^{\frac{1}{2}} \det(\lambda I)^{-\frac{1}{2}}}{\delta} \leq \frac{1}{2} S_{\gamma,T} (1 + S_{2\gamma-2\alpha,t}).$$

Thus, from Lemma 5 we have

$$\mathbb{P}(\exists t \in [T] : \theta \notin \mathcal{C}_t) = 1 - \mathbb{P}(\theta \in \mathcal{C}_t, \forall t \in [T]) \leq \delta = 1/\sum_{s=1}^T s^\gamma.$$

330  
331  
332  
333  
334  
335  
336  
337  
338  
339  
340  
341  
342  
343  
344  
345  
346  
347  
348  
349  
350  
351  
352  
353  
354  
355  
356  
357  
358  
359  
360  
361  
362  
363  
364  
365  
366  
367  
368  
369  
370  
371  
372  
373  
374  
375  
376  
377  
378  
379  
380  
381  
382  
383  
384

385 Now we fix  $a$  and  $b$ , and let  $p^* = \phi(\theta) = \frac{a}{2b}$  be the optimal price. Assume that  $\theta \in \mathcal{C}_{t-1}$  happens for all  $t \in (T_0, T]$ , then  
 386 we have

$$387 \quad t^\gamma p^*(a - bp^*) - t^\gamma p_t(a - bp_t) \leq b_{\max} t^\gamma \|\phi(\theta) - \phi(\vartheta_t)\|_2^2 = t^\gamma O(\|\theta - \vartheta_t\|_2^2).$$

389 We let  $\vartheta_t = (\alpha_t, \beta_t)$ , and further let  $\Delta\alpha_t = \alpha_t - a$  and  $\Delta\beta_t = \beta_t - b$ , then we have

$$390 \quad \|\theta - \vartheta_t\|_{\mathcal{J}_{t-1}}^2 \leq \|\theta - \hat{\theta}_t\|_{\mathcal{J}_{t-1}}^2 + \|\hat{\theta}_t - \vartheta_t\|_{\mathcal{J}_{t-1}}^2 \leq 2w_{t-1}^2,$$

393 which is equivalent to

$$394 \quad \lambda(\Delta\alpha_t^2 + \Delta\beta_t^2) + \sum_{s=1}^{t-1} s^{2\gamma-2\alpha} (\Delta\alpha_t + \Delta\beta_t p_s)^2 \leq 2w_{t-1}^2.$$

398 If  $\Delta\beta_t = 0$ , then

$$400 \quad \|\theta - \vartheta_t\|^2 = \Delta\alpha_t^2 + \Delta\beta_t^2 = \Delta\alpha_t^2 \leq \frac{2w_{t-1}^2}{\sum_{s=1}^{T_0} s^{2\gamma-2\alpha}} \leq O\left(\frac{1}{T^{\eta(2\gamma-2\alpha+1)}}\right).$$

404 Else, we let  $\gamma_t = \frac{\Delta\alpha_t}{\Delta\beta_t}$ . Then

$$405 \quad \Delta\beta_t^2 \leq \frac{2w_{t-1}^2}{\sum_{s=1}^{t-1} s^{2\gamma-2\alpha} (\gamma_t + p_s)^2},$$

409 which means

$$410 \quad \|\theta - \vartheta_t\|_2^2 = \Delta\beta_t^2 (1 + \gamma_t^2) \leq \frac{2w_{t-1}^2 (1 + \gamma_t^2)}{\sum_{s=1}^{T_0} s^{2\gamma-2\alpha} (\gamma_t + p_s)^2}.$$

414 If  $|\gamma_t| \leq 2u$ , then

$$\begin{aligned} 415 \quad & \frac{1 + \gamma_t^2}{\sum_{s=1}^{T_0} s^{2\gamma-2\alpha} (\gamma_t + p_t)^2} \leq \frac{1 + 4u^2}{\sum_{s=1, s \text{ odd}}^{T_0} s^{2\gamma-2\alpha} (l_0 + \gamma_t)^2 + \sum_{s=1, s \text{ even}}^{T_0} s^{2\gamma-2\alpha} (u_0 + \gamma_t)^2} \\ 417 \quad & \leq \frac{(1 + 4u^2) \sum_{s=1}^{T_0} s^{2\gamma-2\alpha}}{(u_0 - l_0)^2 (\sum_{s=1, s \text{ odd}}^{T_0} s^{2\gamma-2\alpha}) (\sum_{s=1, s \text{ even}}^{T_0} s^{2\gamma-2\alpha})} \quad (\text{Cauchy Inequality}) \\ 419 \quad & \leq \frac{4(1 + 4u^2) \sum_{s=1}^{T_0} s^{2\gamma-2\alpha}}{(u_0 - l_0)^2 \left( (\sum_{s=1}^{T_0} s^{2\gamma-2\alpha})^2 - (T_0^{2\gamma-2\alpha})^2 \right)} \\ 421 \quad & \leq \frac{4 + 16u^2}{(u_0 - l_0)^2 \sum_{s=1}^{T_0-1} s^{2\gamma-2\alpha}} = O\left(\frac{1}{T^{\eta(2\gamma-2\alpha+1)}}\right). \end{aligned}$$

427 If  $|\gamma_t| > 2u$ , then

$$\begin{aligned} 429 \quad & \frac{1 + \gamma_t^2}{\sum_{s=1}^{T_0} s^{2\gamma-2\alpha} (\gamma_t + p_t)^2} \leq \frac{1 + \gamma_t^2}{\sum_{s=1}^{T_0} s^{2\gamma-2\alpha} (|\gamma_t| - u)^2} \\ 430 \quad & = \frac{1 + \frac{1}{\gamma_t^2}}{\sum_{s=1}^{T_0} s^{2\gamma-2\alpha} \left(1 - \frac{u}{|\gamma_t|}\right)^2} \leq \frac{1 + 4u^2}{\sum_{s=1}^{T_0} s^{2\gamma-2\alpha} u^2} \leq O\left(\frac{1}{T^{\eta(2\gamma-2\alpha+1)}}\right). \end{aligned}$$

435 Therefore,

$$436 \quad \|\theta - \vartheta_t\|_2^2 \leq O\left(\frac{w_{t-1}^2}{T^{\eta(2\gamma-2\alpha+1)}}\right), \quad \forall T_0 < t \leq T.$$

439



We have

$$\begin{aligned}
 R_{\hat{\theta}}^{\pi}(T) &\leq b_{\max}(u-l)^2 \sum_{t=1}^{T_0} t^{\gamma} + KT^{\gamma} \sum_{t=T_0+1}^T \|\theta - \vartheta_t\|_2^2 + \sum_{t=T_0+1}^T \frac{b_{\max}(u-l)^2 t^{\gamma}}{\sum_{s=1}^T s^{\gamma}} \\
 &\leq O(T^{\eta(\gamma+1)}) + O(w_{T-1}^2 T^{\gamma+1-\eta(2\gamma-2\alpha+1)}) + O(1) \\
 &= O(T^{\frac{(\gamma+1)^2}{3\gamma-2\alpha+2}} \log T).
 \end{aligned}$$

□

#### A.4. Proofs for Section 3.4

*Proof of Theorem 4.* Let  $\mathcal{J}_{t,i}$  denote the adjoint matrix of the  $i$ th diagonal element of  $\mathcal{J}_t$ . Then  $\|e_i\|_{\mathcal{J}_t^{-1}} = \left(\frac{\det(\mathcal{J}_{t,i})}{\det(\mathcal{J}_t)}\right)^{\frac{1}{2}}$ . To prove the theorem we need the following crucial lemma that characterizes the lower bound of the determinant of the information matrix.

**Lemma.** *Given  $\alpha \geq 0$  and  $\gamma > 0$ , there exists some constant  $C$  such that for all  $T$  and corresponding  $T_0$ , we have*

$$\det(\mathcal{J}_{T_0}) \geq C \left( \sum_{s=1}^{T_0} s^{-2\alpha} \right) \left( \sum_{s=1}^{T_0} s^{2\gamma-2\alpha} \right)^2. \quad (9)$$

*Proof of Lemma.* In the following proof, for simplicity of notation, we will ignore the  $T_0$  in subscripts. Also, without loss of generality, we write  $l$  and  $u$  instead of  $l_0$  and  $u_0$ . For any  $x \geq -1$ ,  $S_{x,t} \rightarrow +\infty$ . Thus

$$\begin{aligned}
 P_{x,t} &= l \sum_{s \text{ odd}} s^x + u \sum_{s \text{ even}} s^x = S_{x,t} \left( \frac{l+u}{2} + o(1) \right), \\
 Q_{x,t} &= l^2 \sum_{s \text{ odd}} s^x + u^2 \sum_{s \text{ even}} s^x = S_{x,t} \left( \frac{l^2+u^2}{2} + o(1) \right).
 \end{aligned}$$

Case 1: When  $\alpha \leq \frac{1}{2}$ ,  $2\gamma - 2\alpha > \gamma - 2\alpha > -2\alpha \geq -1$ . Therefore, as  $T_0 \rightarrow +\infty$ , we have

$$\begin{aligned}
 \det(\mathcal{J}_{T_0}) &\geq S_{-2\alpha}(S_{2\gamma-2\alpha}Q_{2\gamma-2\alpha} - P_{2\gamma-2\alpha}^2) - S_{2\gamma-2\alpha}P_{\gamma-2\alpha}^2 - Q_{2\gamma-2\alpha}S_{\gamma-2\alpha}^2 + 2S_{\gamma-2\alpha}P_{\gamma-2\alpha}P_{2\gamma-2\alpha} \\
 &= S_{-2\alpha} \left( S_{2\gamma-2\alpha}^2 \left( \frac{l^2+u^2}{2} + o(1) \right) - S_{2\gamma-2\alpha}^2 \left( \frac{l+u}{2} + o(1) \right)^2 \right) + \\
 &\quad S_{2\gamma-2\alpha}S_{\gamma-2\alpha}^2 \left( - \left( \frac{l+u}{2} + o(1) \right)^2 - \left( \frac{l^2+u^2}{2} + o(1) \right) + 2 \left( \frac{l+u}{2} + o(1) \right)^2 \right) \\
 &= S_{2\gamma-2\alpha}(S_{-2\alpha}S_{2\gamma-2\alpha} - S_{\gamma-2\alpha}^2) \left( \left( \frac{u-l}{2} \right)^2 + o(1) \right) \\
 &= S_{-2\alpha}S_{2\gamma-2\alpha}^2 \left( 1 - \frac{S_{\gamma-2\alpha}^2}{S_{-2\alpha}S_{2\gamma-2\alpha}} \right) \left( \left( \frac{u-l}{2} \right)^2 + o(1) \right) \\
 &\geq S_{-2\alpha}S_{2\gamma-2\alpha}^2 \left( 1 - \frac{\left( \frac{T_0^{\gamma-2\alpha+1}-1}{\gamma-2\alpha+1} + 1 + T_0^{\gamma-2\alpha} \right)^2}{\left( \frac{T_0^{1-2\alpha}-1}{1-2\alpha} \right) \left( \frac{T_0^{2\gamma-2\alpha+1}-1}{2\gamma-2\alpha+1} \right)} \right) \left( \left( \frac{u-l}{2} \right)^2 + o(1) \right) \\
 &= \Omega(S_{-2\alpha}S_{2\gamma-2\alpha}^2).
 \end{aligned}$$

Case 2: When  $\alpha > \frac{1}{2}$ ,  $S_{-2\alpha, t} < +\infty$ , so we only need to prove that  $\det(\mathcal{J}_{T_0}) \geq C \left( \sum_{s=1}^{T_0} s^{2\gamma-2\alpha} \right)^2$ . In fact, we have

$$\begin{aligned} \det(\mathcal{J}_{T_0}) &= \det(\mathcal{J}_{T_0,0}) \det(\lambda + S_{-2\alpha} - [S_{\gamma-2\alpha} P_{\gamma-2\alpha}] \mathcal{J}_{T_0,0}^{-1} [S_{\gamma-2\alpha} P_{\gamma-2\alpha}]^\top) \\ &\geq \det(\mathcal{J}_{T_0,0}) \lambda \\ &\geq \lambda (S_{2\gamma-2\alpha} Q_{2\gamma-2\alpha} - P_{2\gamma-2\alpha}^2) \\ &= \lambda S_{2\gamma-2\alpha}^2 \left( \frac{l^2 + u^2}{2} + o(1) - \left( \frac{l+u}{2} + o(1) \right)^2 \right) = \Omega(S_{2\gamma-2\alpha}^2). \end{aligned}$$

□

Let  $\delta = 1/S_{\gamma, T}$ , by utilizing (8), we have

$$\frac{\det(\mathcal{J}_t)^{\frac{1}{2}} \det(\lambda I)^{-\frac{1}{2}}}{\delta} \leq S_{\gamma, T} \left(1 + \frac{S_{-2\alpha, t}}{\lambda}\right)^{\frac{1}{2}} \det(\mathcal{J}_{t,0}/\lambda)^{\frac{1}{2}} \leq \frac{1}{2} S_{\gamma, T} \left(1 + \frac{S_{-2\alpha, t}}{\lambda}\right)^{\frac{1}{2}} (1 + S_{2\gamma-2\alpha, t}).$$

In the following, we consider the case where  $\theta \in \mathcal{C}_t$  for all  $t$ , which holds w.p. at least  $1 - \delta$ .

From (9), for any  $t > T_0$ , we have

$$\begin{aligned} |\theta(i) - \vartheta_t(i)|^2 &\leq \|e_i\|_{\mathcal{J}_t^{-1}}^2 O(\log t) \leq \|e_i\|_{\mathcal{J}_{T_0}^{-1}}^2 O(\log t) \\ &= \frac{\det(\mathcal{J}_{T_0, i})}{\det(\mathcal{J}_{T_0})} O(\log t) = O\left(\frac{\det(\mathcal{J}_{T_0, i}) \log t}{\left(\sum_{s=1}^{T_0} s^{-2\alpha}\right) \left(\sum_{s=1}^{T_0} s^{2\gamma-2\alpha}\right)^2}\right). \end{aligned}$$

Also, we have

$$\begin{aligned} \det(\mathcal{J}_{T_0,0}) &\leq O\left(\left(\sum_{s=1}^{T_0} s^{2\gamma-2\alpha}\right)^2\right), \\ \det(\mathcal{J}_{T_0,1}) &\leq O\left(\left(\sum_{s=1}^{T_0} s^{-2\alpha}\right) \left(\sum_{s=1}^{T_0} s^{2\gamma-2\alpha}\right)\right), \\ \det(\mathcal{J}_{T_0,2}) &\leq O\left(\left(\sum_{s=1}^{T_0} s^{-2\alpha}\right) \left(\sum_{s=1}^{T_0} s^{2\gamma-2\alpha}\right)\right). \end{aligned}$$

This implies that

$$\begin{aligned} R_{\theta}^{\pi}(T) &\leq b_{\max}(u-l)^2 \sum_{t=1}^{T_0} t^{\gamma} + b_{\max} T^{\gamma} \sum_{t=T_0+1}^T \|\phi(\theta) - \phi(\vartheta_t)\|_2^2 + \sum_{t=T_0+1}^T \frac{b_{\max}(u-l)^2 t^{\gamma}}{\sum_{s=1}^T s^{\gamma}} \\ &= O(T^{\frac{(\gamma+1)^2}{3\gamma-2\alpha+2}}) + b_{\max} T^{\gamma} \sum_{t=T_0+1}^T \sum_{i=1}^3 \sup_{\theta' \in \Theta} \left(\frac{\partial \phi(\theta')}{\partial \theta'(i)}\right)^2 |\theta(i) - \vartheta_t(i)|^2 \\ &= O(T^{\frac{(\gamma+1)^2}{3\gamma-2\alpha+2}}) + T^{\gamma} \sum_{t=T_0+1}^T O\left(\frac{t^{-2\gamma} \log t}{\sum_{s=1}^{T_0} s^{-2\alpha}}\right) + O\left(\frac{\log t}{\sum_{s=1}^{T_0} s^{2\gamma-2\alpha}}\right) + O\left(\frac{\log t}{\sum_{s=1}^{T_0} s^{2\gamma-2\alpha}}\right) \\ &\leq O(T^{\frac{(\gamma+1)^2}{3\gamma-2\alpha+2}}) + T^{\gamma} \sum_{t=T_0+1}^T O\left(\frac{1}{\sum_{s=1}^{T_0} s^{2\gamma-2\alpha}}\right) \log T \\ &= O(T^{\frac{(\gamma+1)^2}{3\gamma-2\alpha+2}} \log T). \end{aligned}$$

□

**B. Proofs for Section 4**

*Proof of Theorem 5.* In the following proof, we assume that the reward of each arm in the first period is a Gaussian variable with variance  $\sigma^2$ . We consider  $\theta_1 = (\delta, 0, \dots, 0)$  and  $\theta_2 = (\delta, 0, \dots, 0, 2\delta, 0, \dots, 0)$  with  $\delta > 0$  to be determined later, where

$$\theta_2(j) = \begin{cases} 2\delta, & \text{if } j = \arg \min_{i>1} \{\sum_{t=1}^T t^{2\gamma-2\alpha} \mathbb{P}_{\theta_1}^\pi(A_t = i)\} \triangleq i^*, \\ \theta_1(j), & \text{otherwise} \end{cases}$$

We have  $R_{\theta_1}^\pi(T) = \mathbb{E}_{\theta_1}^\pi \left[ \delta \sum_{t=1}^T \gamma^t \mathbb{1}\{A_t \neq 1\} \right]$  and  $R_{\theta_2}^\pi(T) \geq \mathbb{E}_{\theta_2}^\pi \left[ \delta \sum_{t=1}^T \gamma^t \mathbb{1}\{A_t = 1\} \right]$ . Denoting  $D(\mathbb{P}, \mathbb{Q})$  as the KL divergence of two probability measures  $\mathbb{P}$  and  $\mathbb{Q}$ , we thus have

$$\begin{aligned} R_{\theta_1}^\pi(T) + R_{\theta_2}^\pi(T) &\geq \delta \sum_{t=1}^T t^\gamma (\mathbb{P}_{\theta_1}^\pi(A_t \neq 1) + \mathbb{P}_{\theta_2}^\pi(A_t = 1)) \\ &\geq \frac{1}{2} \delta \sum_{t=1}^T t^\gamma \exp(-D(\mathbb{P}_{\theta_1}^\pi, \mathbb{P}_{\theta_2}^\pi)) \\ &= \frac{1}{2} \delta \sum_{t=1}^T t^\gamma \exp(-\mathbb{E}_{\theta_1}^\pi \left[ \sum_{s=1}^T D(\mathbb{P}_{\theta_1(A_s)}, \mathbb{P}_{\theta_2(A_s)}) \right]) \\ &= \frac{1}{2} \delta \exp\left(-\sum_{t=1}^T \mathbb{P}_{\theta_1}^\pi(A_t = i^*) t^{2\gamma-2\alpha} \frac{4\delta^2}{\sigma^2}\right) \sum_{t=1}^T t^\gamma \\ &\geq \frac{\delta}{2} \exp\left(-\frac{4\delta^2 \sum_{t=1}^T t^{2\gamma-2\alpha}}{(K-1)\sigma^2}\right) \sum_{t=1}^T t^\gamma, \end{aligned}$$

where for the first equality we utilize a divergence decomposition for general action spaces (see Exercise 15.8 in [Lattimore & Szepesvári, 2019](#)), and for the second equality we apply a known result on the KL divergence between two Gaussian distributions with same variance. Now we let  $\delta = \frac{\sqrt{K-1}\sigma}{2\sqrt{\sum_{t=1}^T t^{2\gamma-2\alpha}}}$ , then we can obtain that the regret is no less than

$$\frac{e^{-1}}{4} \sqrt{K-1}\sigma \frac{\sum_{t=1}^T t^\gamma}{\sqrt{\sum_{t=1}^T t^{2\gamma-2\alpha}}} = \Omega(\sqrt{K}T^{\alpha+\frac{1}{2}}).$$

□

*Proof of Theorem 6.* Let  $\beta = 1 + \frac{(\gamma+1-\alpha)(\gamma+1)}{\alpha+\frac{1}{2}} \geq \frac{3}{2}$ . Fix the total time periods as  $T$ . Set  $T_0 = T^{\frac{\alpha+\frac{1}{2}}{\gamma+1}} < T$ . We split  $[1, T]$  as  $[1, T_0]$  and  $(T_0, T]$ . For  $[1, T_0]$ , the regret is at most

$$\sum_{t=1}^{T_0} t^\gamma = T_0^{\gamma+1} = O(T^{\alpha+\frac{1}{2}})$$

Now we focus on what happened after  $T_0$ . From Lemma 1, we know that for any time period  $t$ , if  $A_t = i$ , then  $r(i) \notin \mathcal{C}(i)$  w.p. at most  $2 \exp(-\beta \log t) = 2t^{-\beta}$ . Thus  $r(i) \in \mathcal{C}(i)$  holds for all time periods  $t > T_0$  and all  $i \in [K]$  such that  $A_t = i$  w.p. at least

$$1 - \sum_{t=T_0+1}^T 2t^{-\beta} \geq 1 - \int_{t=T_0}^{+\infty} 2t^{-\beta} dt = 1 - \frac{2}{\beta-1} T_0^{-(\beta-1)}.$$

If this does not hold, the expected regret is at most

$$\frac{2}{\beta-1} T_0^{-(\beta-1)} \sum_{s=1}^T s^\gamma = O(T^{\gamma+1-\frac{(\beta-1)(\alpha+\frac{1}{2})}{\gamma+1}}) = O(T^\alpha).$$

Now we assume that  $r(i) \in \mathcal{C}(i)$  always holds for all time periods  $t > T_0$  and  $i \in [K]$  such that  $A_t = i$ . Since for any activated arm, we construct a new confidence interval once after we pull it, thus by assumption all reward parameters lie in all the confidence intervals we construct. Therefore, the optimal arm  $i^*$  is forever activated. Suppose that in some period  $\max\{T_0, 2K\} < t \leq T$ , we pull an arm  $i$  that is not optimal. Then within the round that contains  $t$ , the gap between  $r(i)$  and the reward of the optimal arm  $r(i^*)$  is bounded by the sum of the lengths of confidence intervals in the last round. Here, a “round” means pulling all arms in the activation set once. If not, then arm  $i$  or  $i^*$  must be eliminated before time period  $t$ . Suppose when the last round ends, the time period is  $t - K \leq \tilde{t} < t$ . Thus

$$\Delta_t \leq \sigma 2\sqrt{2\beta} \left( \frac{1}{\sqrt{\sum_{s \leq \tilde{t}, A_s = i} s^{2\gamma-2\alpha}}} + \frac{1}{\sqrt{\sum_{s \leq \tilde{t}, A_s = i^*} s^{2\gamma-2\alpha}}} \right) \log T$$

Next, we seek to bound  $\sum_{s \leq \tilde{t}, A_s = i} s^{2\gamma-2\alpha}$  and  $\sum_{s \leq \tilde{t}, A_s = i^*} s^{2\gamma-2\alpha}$ . Consider the activation set  $\mathcal{A}$  before the deactivation procedure in the last round. For any arm  $i_1 \in \mathcal{A}$  and  $j_1 \notin \mathcal{A}$ , since we pull each arm in a fixed order, and in the last round we pull  $i_1$  but do not pull  $j_1$ , we have

$$\sum_{s \leq \tilde{t}, A_s = j_1} s^{2\gamma-2\alpha} \leq \sum_{s \leq \tilde{t}, A_s = i_1} s^{2\gamma-2\alpha}.$$

For any two arms  $i_1, i_2 \in \mathcal{A}$ , since in all rounds  $i_1$  is pulled either before or after  $i_2$ , we have

$$\begin{aligned} & \sum_{s \leq \tilde{t}, A_s = i_1} s^{2\gamma-2\alpha} - \sum_{s \leq \tilde{t}, A_s = i_2} s^{2\gamma-2\alpha} \\ &= \max_{s \leq \tilde{t}, A_s = i_1} s^{2\gamma-2\alpha} + \left( \sum_{s \leq \tilde{t}, A_s = i_1} s^{2\gamma-2\alpha} - \max_{s \leq \tilde{t}, A_s = i_1} s^{2\gamma-2\alpha} \right) - \sum_{s \leq \tilde{t}, A_s = i_2} s^{2\gamma-2\alpha} \\ &\leq \max_{s \leq \tilde{t}, A_s = i_1} s^{2\gamma-2\alpha} \leq \tilde{t}^{2\gamma-2\alpha}. \end{aligned}$$

Thus,

$$\sum_{s \leq \tilde{t}, A_s = i} s^{2\gamma-2\alpha} \geq \frac{1}{|\mathcal{A}|} \left( \sum_{s \leq \tilde{t}, s \in \mathcal{A}} s^{2\gamma-2\alpha} - (|\mathcal{A}| - 1)\tilde{t}^{2\gamma-2\alpha} \right) \geq \frac{1}{K} \sum_{s \leq \tilde{t}} s^{2\gamma-2\alpha} - \tilde{t}^{2\gamma-2\alpha}.$$

The inequality above is also valid when we replace  $i$  with  $i^*$ . Since  $i$  and  $i^*$  are still activated after the last round, then we must have  $i, i^* \in \mathcal{A}$ . Therefore,

$$\begin{aligned} \Delta_t &\leq O \left( \frac{\sqrt{K} \log T}{\sqrt{\sum_{s \leq \tilde{t}} s^{2\gamma-2\alpha} - K\tilde{t}^{2\gamma-2\alpha}}} \right) \\ &= O \left( \frac{\sqrt{K} \log T}{\sqrt{\sum_{s \leq \tilde{t}} s^{2\gamma-2\alpha}}} \right) \left( \sqrt{\frac{\sum_{s \leq \tilde{t}} s^{2\gamma-2\alpha}}{\sum_{s \leq \tilde{t}} s^{2\gamma-2\alpha} - K\tilde{t}^{2\gamma-2\alpha}}} \right) \\ &\leq \sqrt{K} O(t^{\alpha-\gamma-\frac{1}{2}} \log T) \sqrt{\frac{1 + \frac{\sum_{\tilde{t} < s \leq t} s^{2\gamma-2\alpha}}{\sum_{s \leq \tilde{t}} s^{2\gamma-2\alpha}}}{1 - K \frac{\tilde{t}^{2\gamma-2\alpha}}{\sum_{s \leq \tilde{t}} s^{2\gamma-2\alpha}}}} \\ &\leq \sqrt{K} O(t^{\alpha-\gamma-\frac{1}{2}}) \sqrt{\frac{1 + K \frac{\tilde{t}^{2\gamma-2\alpha}}{\sum_{s \leq t-K} s^{2\gamma-2\alpha}}}{1 - K \frac{\tilde{t}^{2\gamma-2\alpha}}{\sum_{s \leq t-K} s^{2\gamma-2\alpha}}}} \log T \end{aligned}$$

Since  $\lim_{t \rightarrow +\infty} \frac{\tilde{t}^{2\gamma-2\alpha}}{\sum_{s \leq t-K} s^{2\gamma-2\alpha}} = 0$ , there exists  $T_1$  such that for all  $T_0 \geq T_1$ , we have  $\frac{T_0^{2\gamma-2\alpha}}{\sum_{s \leq T_0-K} s^{2\gamma-2\alpha}} \leq \frac{1}{2K}$ . As a result,

660 for all  $T \geq T_1^{\frac{\gamma+1}{\alpha+\frac{1}{2}}}$ , we have

$$\begin{aligned}
 661 \quad R_{\theta}^{\pi}(T) &\leq \sum_{t=1}^{T_0} t^{\gamma} + O(T^{\alpha}) + \sum_{t=T_0+1}^T t^{\gamma} \sqrt{K} O(t^{\alpha-\gamma-\frac{1}{2}}) \log T \\
 662 \quad &\leq O(\sqrt{K} T^{\alpha+\frac{1}{2}} \log T).
 \end{aligned}$$

667 □

## 668 **References**

- 669 Gill, R. D., Levit, B. Y., et al. Applications of the van trees inequality: a bayesian cramér-rao bound. *Bernoulli*, 1(1-2):
- 670 59–79, 1995.
- 671 Keskin, N. B. and Zeevi, A. Dynamic pricing with an unknown demand model: Asymptotically optimal semi-myopic
- 672 policies. *Operations Research*, 62(5):1142–1167, 2014.
- 673 Lattimore, T. and Szepesvári, C. *Bandit algorithms*. Cambridge University Press (preprint), 2019.

660  
661  
662  
663  
664  
665  
666  
667  
668  
669  
670  
671  
672  
673  
674  
675  
676  
677  
678  
679  
680  
681  
682  
683  
684  
685  
686  
687  
688  
689  
690  
691  
692  
693  
694  
695  
696  
697  
698  
699  
700  
701  
702  
703  
704  
705  
706  
707  
708  
709  
710  
711  
712  
713  
714
